# Supplementary figures and images for: Forsythia Fruit Prevents Fulminant Hepatitis in Mice and Ameliorates Inflammation in Murine Macrophages
Source: MDPI journal article supplement (doi:10.3390/nu13082901), 2021-08-23

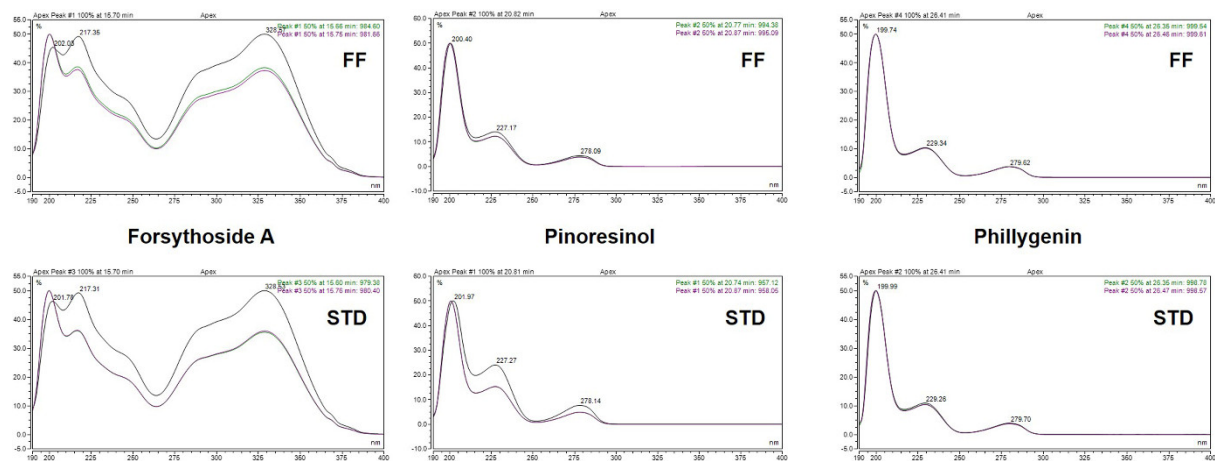

**Figure S1.** UV chromatogram of each standard compounds and FF.

Supplement: s1 [file s1]
